# Supplementary material for: Adjuvant and carrier protein-dependent T-cell priming promotes a robust antibody response against the Plasmodium falciparum Pfs25 vaccine candidate
Source: PubMed Central journal article supplement (PMC5238395; doi:10.1038/srep40312), 2017-01-16
Supplement: srep40312-s1.pdf [file srep40312-s1.pdf]

1 **Supplementary Information**

2  
3 **Adjuvant and carrier protein-dependent T-cell priming promotes a robust**  
4 **antibody response against the *Plasmodium falciparum* Pfs25 vaccine**  
5 **candidate**

6 Andrea J. Radtke<sup>1,5</sup>, Charles F. Anderson<sup>2,5\*</sup>, Nicolas Riteau<sup>3,5</sup>, Kelly Rausch<sup>2</sup>,  
7 Puthupparampil Scaria<sup>2</sup>, Emily R. Kelnhofer<sup>2</sup>, Randall F. Howard<sup>4</sup>, Alan Sher<sup>3,6</sup>,  
8 Ronald N. Germain<sup>1,6</sup>, Patrick Duffy<sup>2,6</sup>

9  
10 <sup>1</sup>Laboratory of Systems Biology, NIAID/NIH

11 <sup>2</sup>Laboratory of Malaria Immunology and Vaccinology, NIAID/NIH

12 <sup>3</sup>Laboratory of Parasitic Diseases, NIAID/NIH

13 <sup>4</sup>Infectious Disease Research Institute, Seattle, WA

14 <sup>5</sup>A.J.R., C.F.A., and N.R. contributed equally to this work

15 <sup>6</sup>A.S, R.N.G, and P.D. contributed equally to this work

16  
17 \*Correspondence to cfanderson@niaid.nih.gov

18  
19  
20 **Supplementary Figures and Tables**

- 21 ○ Figure S1
- 22 ○ Figure S2
- 23 ○ Figure S3
- 24 ○ Table S1
- 25 ○ Table S2
- 26 ○ Table S3

27 **Supplementary Methods**

- 28 ○ Proteins and Conjugation
- 29 ○ Adjuvants
- 30 ○ ELISAs
- 31 ○ B Cell ELISpots
- 32 ○ Antibodies

33  
34

35

36

37

38

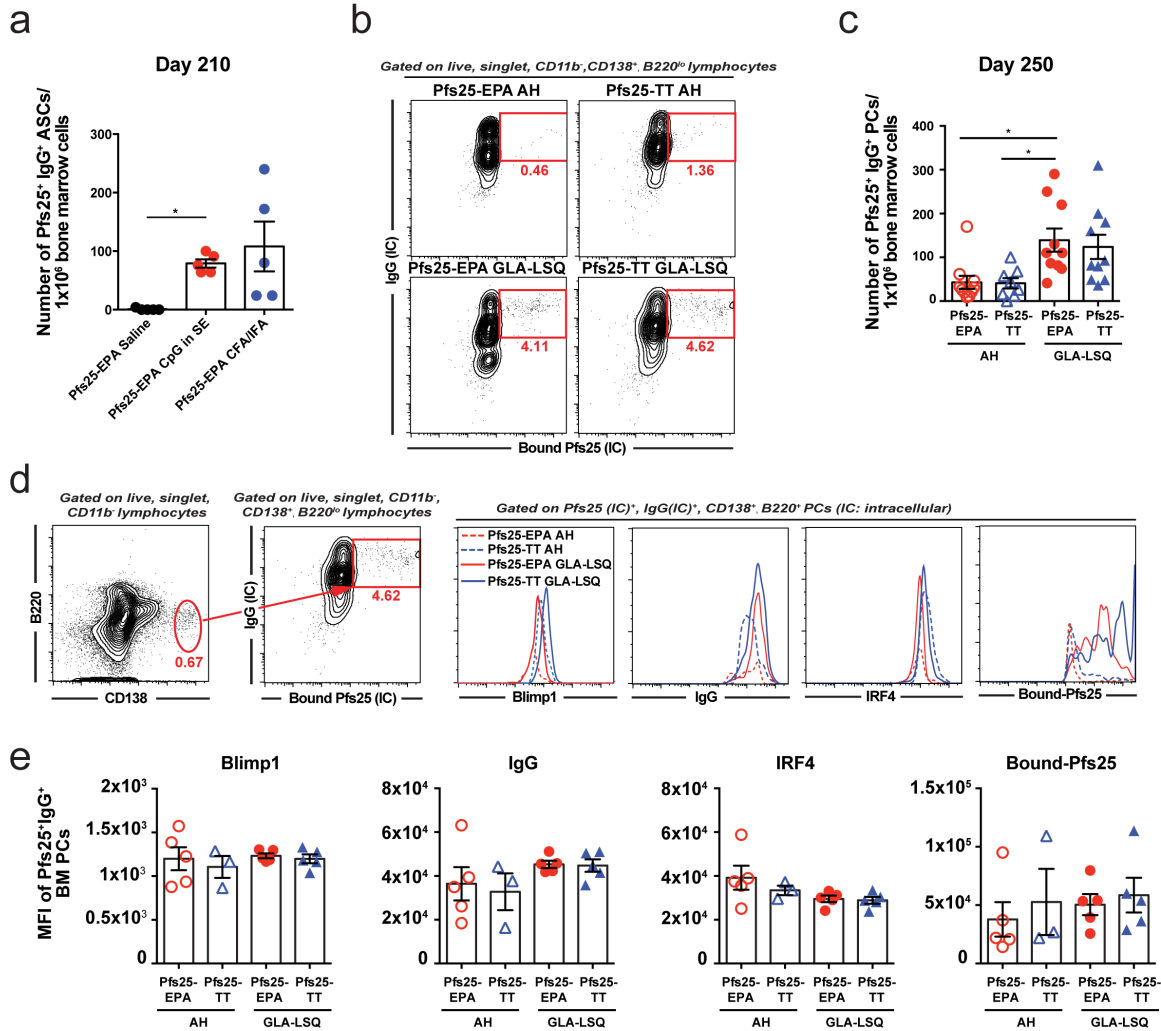

39

40 **Figure S1. Effect of adjuvants and carrier proteins on anti-Pfs25 IgG**  
 41 **responses**

42 Mice were immunized i.m. with 1  $\mu$ g Pfs25 alone or Pfs25-EPA formulated  
 43 in various adjuvants on day 0 and day 28. Bone marrow was harvested at the  
 44 indicated time points. **(a)** Number of ASCs specific for Pfs25 in the bone marrow  
 45 of mice on day 210 calculated via ELISpot. Shown is the mean  $\pm$  SEM, n=5 mice  
 46 per group. **(b)** Expansion of Pfs25<sup>+</sup>IgG<sup>+</sup> specific PCs in the bone marrow of  
 47 immunized mice on day 250. IC denotes intracellular staining with Pfs25 and for  
 48 IgG. **(c)** Number of Pfs25<sup>+</sup>IgG<sup>+</sup> PCs in the bone marrow on day 250 calculated

49 via flow cytometry. Shown is the mean  $\pm$  SEM, n=10 mice per group. **(d)**  
50 Representative flow plots and gating strategy used to examine protein  
51 expression by antigen-specific PCs in the bone marrow at day 250. **(e)** Graph  
52 plots of mean fluorescence intensities (MFI) of intracellular Blimp-1, IgG, IRF4,  
53 and bound Pfs25 in antigen-specific PCs from the bone marrow of mice  
54 immunized 250 days earlier. Data are from one experiment and are  
55 representative of 2 similar experiments. (\* =  $P < 0.05$ ; One-way ANOVAs with  
56 Tukey post-tests).

57

58

59

60

61

62

63

64

65

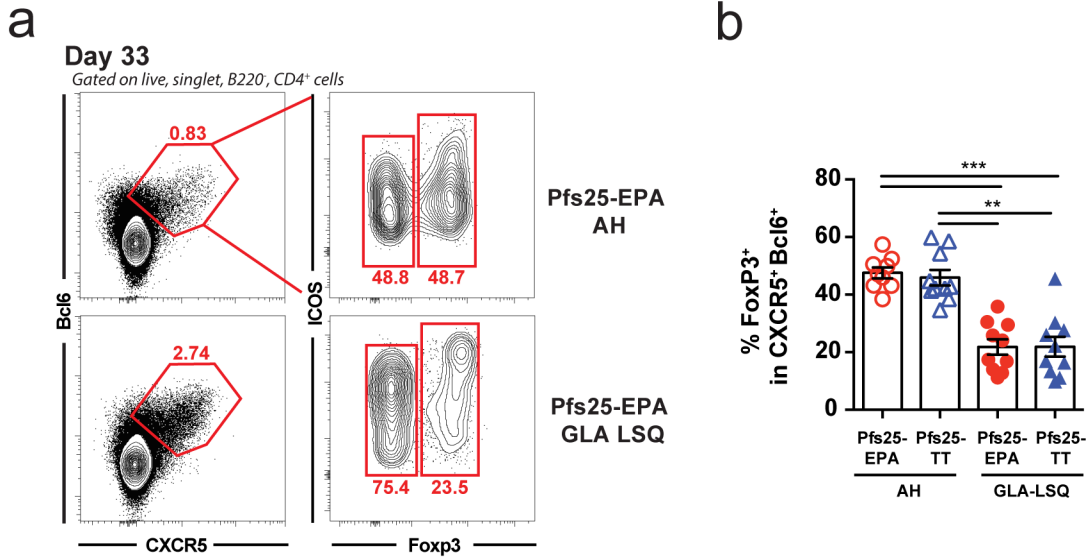

66

67 **Figure S2. Evaluation of Tfh and Tfr cell responses at day 33**

68 Mice were immunized i.m. with 1  $\mu$ g Pfs25-EPA or Pfs25-TT in alhydrogel  
 69 or GLA-LSQ on day 0 and day 28. dLNs were harvested on day 33 post-  
 70 immunization and processed for flow cytometry. **(a)** Representative flow  
 71 cytometry plots showing the frequency of CXCR5<sup>+</sup>Bcl6<sup>+</sup> cells (left panels) and the  
 72 frequency of Foxp3<sup>-</sup> (Tfh cells) or Foxp3<sup>+</sup> (Tfr cells) (right panels) within the CD4<sup>+</sup>  
 73 T cell population after immunization with Pfs25-EPA in alhydrogel or GLA-LSQ.  
 74 **(b)** Frequency of Foxp3<sup>+</sup> (Tfr cells) within the CXCR5<sup>+</sup>Bcl6<sup>+</sup>CD4<sup>+</sup> T cell  
 75 population. Shown is the mean  $\pm$  SEM, n=9-10 mice per group. Data are pooled  
 76 from 2 similar experiments. (\*\* = P < 0.01, \*\*\* = P < 0.001; One-way ANOVA with  
 77 Tukey post-tests).

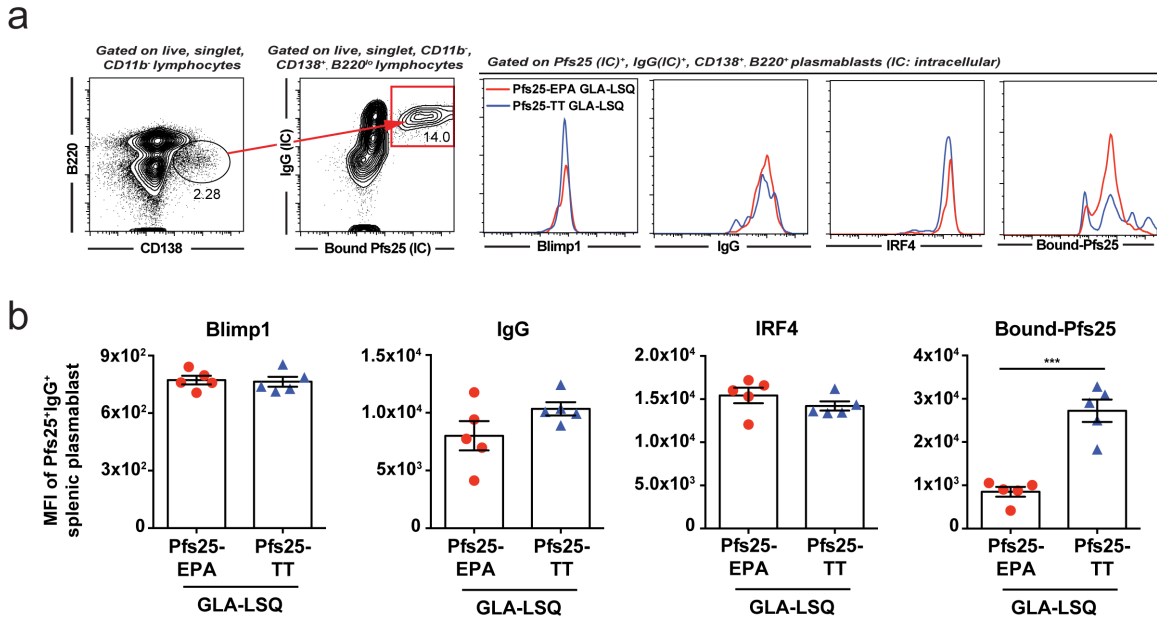

78

79 **Figure S3. Flow cytometric assessment of splenic plasmablasts (Day 33)**

80 Mice were immunized i.m. with 1  $\mu$ g Pfs25-EPA or Pfs25-TT in alhydrogel  
 81 or GLA-LSQ on day 0 and day 28. Spleens were harvested on day 33 post-  
 82 immunization and processed for flow cytometry. **(a)** Representative flow plots  
 83 and gating strategy used to examine protein expression by antigen-specific  
 84 plasmablasts in the spleens at day 33. **(b)** Graph plots of mean fluorescence  
 85 intensities (MFI) of intracellular Blimp-1, IgG, IRF4, and bound Pfs25 in antigen-  
 86 specific plasmablasts from the spleens at day 33. Data are from one experiment  
 87 and are representative of 2 similar experiments. Shown is the mean  $\pm$  SEM, n=5  
 88 mice per group. (\*\*\*) =  $P < 0.001$ ; Mann-Whitney  $U$  test).

89

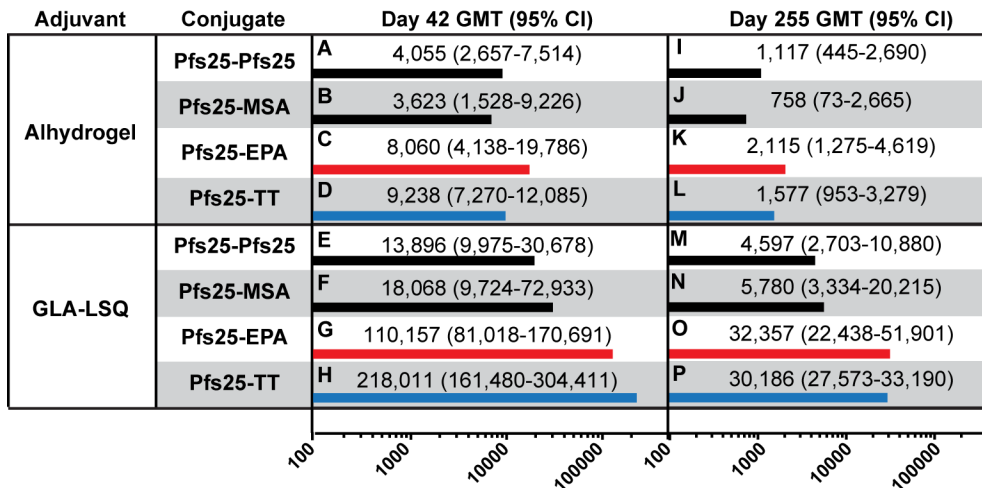

90

91 **Table S1. Evaluation of anti-Pfs25 antibody response following**  
 92 **immunization with different conjugate vaccines**

93 Mice were immunized i.m. with 1 µg of the indicated conjugate vaccines  
 94 on day 0 and day 28. Sera were collected and anti-Pfs25 IgG titers were  
 95 determined by ELISAs. Shown is the geometric mean titer (GMT) with 95%  
 96 confidence interval (CI) from 5–10 mice per group at peak titer (day 42) and  
 97 termination of the study (day 255). Data are from 1 experiment and are  
 98 representative of 3 similar experiments. One-way ANOVAs with Tukey post-tests  
 99 were used to compare differences between anti-Pfs25 IgG titers at day 42 (peak)  
 100 and day 255 (end-point). Bolded letters (A-P) refer to data in that row, for  
 101 example ‘A’ is the GMT (95% CI) for mice immunized with Pfs25-Pfs25 in  
 102 Alhydrogel at day 42. Statistically significant differences are denoted by the  
 103 following: A-G (Day 42 Pfs25-Pfs25 Alhydrogel vs Day 42 Pfs25-EPA GLA-LSQ)  
 104 = \*\*\*\*. A-H (\*\*\*\*), B-G (\*\*\*\*), B-H (\*\*\*\*), C-G (\*\*\*\*), C-H (\*\*\*\*), D-G (\*\*\*\*), D-H  
 105 (\*\*\*\*), E-G (\*\*\*\*), E-H (\*\*\*\*), F-G (\*\*), F-H (\*\*\*\*), G-H (\*\*\*\*), I-O (\*\*\*\*), I-P (\*\*\*\*), J-  
 106 O (\*\*\*\*), J-P (\*\*\*\*), K-O (\*\*\*\*), K-P (\*\*\*\*), L-O (\*\*\*\*), L-P (\*\*\*\*), M-O (\*\*\*\*), M-P

107 (\*\*\*\*), N-O (\*\*\*\*), N-P (\*\*), G-O (\*\*\*\*), and H-P (\*\*\*\*). Colored bars are a  
108 graphical representation of the GMT for all groups. (\*\* = P < 0.01, \*\*\*\* = P <  
109 0.0001).

110

111

112

113

114

115

116

117

118

119

120

121

122

123

124

125

126

127

| Antibody Response | Conjugate | Adjuvant   | Day 42 GMT (95% CI)                 | Day 126 GMT (95% CI)               | Day 236 GMT (95% CI)               | Antibody Half-life (Days) Mean ± SEM |
|-------------------|-----------|------------|-------------------------------------|------------------------------------|------------------------------------|--------------------------------------|
| anti-TT           | Pfs25-TT  | Alhydrogel | <b>A</b> 4,046<br>(2,495-6,561)     | <b>C</b> 2,344<br>(1,233-5,260)    | <b>E</b> 916<br>(416-2,018)        | <b>G</b> 88.99 ± 9.52                |
|                   | Pfs25-TT  | GLA-LSQ    | <b>B</b> 53,827<br>(41,400-69,984)  | <b>D</b> 33,963<br>(24,322-47,424) | <b>F</b> 16,596<br>(10,447-26,363) | <b>H</b> 101.90 ± 8.31               |
|                   | Pfs25-EPA | Alhydrogel | <32                                 | No data                            | No data                            | No data                              |
|                   | Pfs25-EPA | GLA-LSQ    | <32                                 | No data                            | No data                            | No data                              |
| anti-EPA          | Pfs25-EPA | Alhydrogel | <b>I</b> 12,133<br>(6,792-21,677)   | <b>K</b> 8,241<br>(4,315-15,739)   | <b>M</b> 2,472<br>(971-6,295)      | <b>O</b> 71.67 ± 10.37               |
|                   | Pfs25-EPA | GLA-LSQ    | <b>J</b> 74,817<br>(46,773-119,674) | <b>L</b> 34,434<br>(20,323-58,345) | <b>N</b> 15,136<br>(10,116-22,646) | <b>P</b> 88.22 ± 6.25                |
|                   | Pfs25-TT  | Alhydrogel | <24                                 | No data                            | No data                            | No data                              |
|                   | Pfs25-TT  | GLA-LSQ    | <24                                 | No data                            | No data                            | No data                              |

128

129 **Table S2. Humoral immune response elicited by carrier proteins**

130 Mice were immunized i.m. with 1 µg of Pfs25-EPA or Pfs25-TT on day 0  
131 and day 28. Anti-TT and anti-EPA IgG titers were determined by ELISAs from  
132 sera collected at the indicated time points. Shown is the geometric mean titer  
133 (GMT) with 95% confidence interval (CI) from 10 mice per group at peak titer  
134 (day 42), mid-point (day 126), and termination of the study (day 236). Data are  
135 from 1 experiment and are representative of 3 similar experiments. Bolded letters  
136 (A-P) refer to data in that row, for example 'A' is the peak (day 42) anti-TT IgG  
137 GMT (95% CI) for mice immunized with Pfs25-TT in alhydrogel. One-way  
138 ANOVAs with Tukey post-tests were used to compare differences between peak  
139 (day 42), mid-point (day 126), and end-point titers (day 236) for anti-EPA or anti-  
140 TT separately, e.g. rows A-F or I-N. Statistically significant differences are  
141 denoted by the following: A-B (Day 42 anti-TT IgG titers from mice immunized  
142 with Pfs25-TT in Alhydrogel vs Day 42 anti-TT IgG titers from mice immunized  
143 with Pfs25-TT GLA-LSQ) = \*\*\*\*. C-D (\*\*\*\*), E-F (\*\*), B-F (\*\*\*\*), I-J (\*\*\*\*), K-L (\*),



144 and J-N (\*\*\*\*). (\* =  $P < 0.05$ , \*\* =  $P < 0.01$ , \*\*\*\* =  $P < 0.0001$ ). Antibody half-lives  
145 were calculated with titer data from day 126 and day 236 and differences  
146 between groups (G and H) and (O and P) were compared with a Mann-Whitney  
147 *U* test. G-H = not significant (ns), O-P = ns. Colored bars are a graphical  
148 representation of the GMT (A-F and I-N) or mean (G, H, O, and P). Negative  
149 controls include sera collected from mice immunized with the irrelevant conjugate  
150 vaccine. For example, mean anti-TT IgG titers for mice immunized with Pfs25-  
151 EPA in alhydrogel or GLA-LSQ were below the detection limit at day 42 (<32)  
152 and mean anti-EPA IgG titers for mice immunized with Pfs25-TT in alhydrogel or  
153 GLA-LSQ were below the detection limit at day 42 (<24).

154

155

156

157

158

159

|           | Nonamer   | Starting position | Score |
|-----------|-----------|-------------------|-------|
| Pfs25     | VCSCNIGKV | 110               | 3.20  |
| EPA       | YIAGDPALA | 473               | 6.03  |
|           | YRTSLTLAA | 515               | 4.55  |
|           | LAAPEAAGE | 521               | 4.05  |
|           | YLAARLSWN | 301               | 3.18  |
|           | LTCPVAAGE | 373               | 3.05  |
| TT        | YIGPALNIV | 645               | 6.53  |
|           | YLIPVASSS | 1129              | 5.90  |
|           | YSDPVNNDT | 10                | 7.77  |
|           | YFPSVISKV | 595               | 5.47  |
|           | YNAPGIPLY | 1229              | 4.78  |
|           | FSTPIFSY  | 855               | 4.04  |
|           | FNAYLANKW | 1023              | 3.98  |
|           | IFGPGPVLN | 159               | 3.88  |
|           | VDDALINST | 582               | 3.63  |
|           | YNDMFNNFT | 943               | 3.51  |
|           | YGFTEIELG | 356               | 3.33  |
|           | YVPTFDNVI | 202               | 3.30  |
|           | FGGQDANLI | 275               | 3.27  |
|           | FNPPSSLIE | 59                | 3.21  |
|           | YKSNAASTI | 542               | 3.16  |
| YYDPNYLRT | 72        | 3.15              |       |
| YSGPDKEQI | 763       | 3.03              |       |

160 (Score > 3.0 = Good I-A<sup>b</sup> binding candidate)

161 **Table S3. Identification of putative CD4<sup>+</sup> T cell epitopes in carrier proteins**

162 Pfs25 (18 kDa), EPA (67 kDa) and TT (151 kDa) protein sequences were  
 163 submitted to an algorithm developed by Marc Jenkins' laboratory designed to  
 164 predict I-A<sup>b</sup> binding epitopes<sup>1</sup>. This algorithm is based on the fact that peptides  
 165 bind the I-A<sup>b</sup> molecule via a 9 amino acid core sequence, a nonamer.  
 166 Furthermore, peptide positions 2, 5, 7 and 8 are the main TCR contacts for I-A<sup>b</sup>  
 167 binding. Nonamers with a score >3 were considered good I-A<sup>b</sup> binding

168 candidates and listed in the table together with the starting position in their  
169 respective protein sequences.

170

## 171 **Supplementary Methods**

172

173

### 174 **Proteins and Conjugation**

175           Recombinant Pfs25 (average MW=18 kDa) from *P. falciparum* NF54 was  
176 produced in *Pichia pastoris*. Exoprotein A (EPA) (average MW=67 kDa) is a non-  
177 toxic mutant of exotoxin A from *Pseudomonas aeruginosa* produced in *E. coli*.  
178 Tetanus toxoid was provided by Novartis Vaccines and Diagnostics. Mouse  
179 serum albumin was purchased from Sigma Aldrich (essentially globulin free,  
180  $\geq 99\%$  by agarose gel electrophoresis). Antigen conjugates were manufactured at  
181 the LMIV based on a published method<sup>2</sup> using thioether crosslinking chemistry.  
182 In summary, for each conjugate, Pfs25 was thiolated by treatment with S-  
183 acetylthioglycolic acid N-hydroxysuccinimidyl ester (SATA) and deacetylation  
184 with hydroxylamine. The carrier was activated with EMCS (6-Maleimidohexanoic  
185 acid N-hydroxysuccinimide ester (EMCS), and the two components were mixed  
186 to form the nanoparticle. Conjugates were purified and fractionated by Size  
187 Exclusion Chromatography (SEC) and unconjugated monomers were removed.  
188 Conjugate fractions were collected after discarding 10% of the total area under  
189 the conjugate peak (5% each from the leading and tailing ends of the conjugate  
190 peak) to remove high and low molecular weight conjugates. Average molecular  
191 mass and hydrodynamic radius of the conjugates were determined by size  
192 exclusion chromatography coupled with light scattering (SEC-MALS). Protein

193 composition was determined by least squares regression following amino acid  
194 analyses. The weighted average molar mass of Pfs25-EPA was 823 kDa with a  
195 90% MW distribution of 170-2,558 and hydrodynamic radius (Rh, determined by  
196 Dynamic Light Scattering) of 15.4 ( $\pm$  0.4) nm. Weighted average MW of Pfs25-TT  
197 was 2,473 kDa, with a 90% MW distribution of 510-6844 and an Rh of 9.4 ( $\pm$  0.3)  
198 nm. Pfs25-MSA had a weighted average MW of 1,035 kDa, with a 90% MW  
199 distribution of 217-2,936 and an Rh of 17.3 ( $\pm$  0.6) nm. Pfs25-Pfs25 had a  
200 weighted average MW of 713 kDa, with a 90% MW distribution of 174-2,058 and  
201 an Rh of 16.0 ( $\pm$  0.9) nm. Protein composition (antigen/carrier ratio) of the  
202 conjugates were determined by least squares regression following amino acid  
203 analyses.

204

## 205 **Adjuvants**

206           GLA-LSQ and CpG in SE were obtained from the Infectious Disease  
207 Research Institute, Seattle, WA. GLA-LSQ is a liposome-based adjuvant  
208 containing GLA, a synthetic TLR4 agonist, and the saponin QS21. QS21 is a  
209 saponin derived from the bark of *Q. saponaria*. GLA/QS21 content in GLA-LSQ  
210 formulations was 0.1 mg/mL GLA, 0.2 mg/mL QS21 and 2 mg/mL phospholipid in  
211 0.05 mL per dose, or 5  $\mu$ g GLA/10  $\mu$ g QS21/100  $\mu$ g phospholipid per dose. CpG  
212 1826 was formulated in an oil-in-water stable emulsion. The CpG 1826  
213 concentration in CpG-SE was 0.4 mg/mL CpG/2% SE in a final volume of 0.05  
214 mL per dose, or 20  $\mu$ g CpG in 2% SE per dose. Complete and incomplete  
215 Freund's adjuvants were purchased from Sigma Aldrich. Alhydrogel (2%

216 aluminum hydroxide gel) was produced by Brenntag Biosector, Denmark.  
217 Alhydrogel was 1.6 mg/mL per 0.05 mL dose, or 80 µg Alhydrogel per dose.

218

## 219 **ELISAs**

220 Immulon 4 HBX flat bottom microtiter plates (Dynerx Technologies) ELISA  
221 plates were coated with 1 µg/ml of antigen in a volume of 100 µL per well in  
222 carbonate coating buffer (pH 9.6) overnight at 4°C. After blocking in 5% skim milk  
223 in TBS blocking buffer in a volume of 320 µL per well for 2 hrs, samples were  
224 serially diluted in TBS/5% milk and plated in triplicate in a volume of 100 µL per  
225 well and incubated at room temperature for 2 hours. Plates were washed 4 times  
226 and alkaline phosphatase labeled goat anti-mouse IgG (H+L) (Kirkegaard &  
227 Perry Labs, Inc) was added at a dilution of 1:1,000 in a volume of 100 µL per well  
228 and incubated at room temperature for 2 hours. After washing 4 times, dissolved  
229 phosphatase substrate tablets (Sigma) were added in a volume of 100 µL per  
230 well and plates were incubated for 20 minutes before optical densities (OD) were  
231 measured with a Spectramax 340PC (Molecular Devices). Each ELISA plate  
232 contained an internal serum standard from which a four-parameter curve was  
233 calculated with Softmax software. ELISA Units were assigned to test samples  
234 based on the sera dilution that gave an OD of 1.0, adjusted to the internal  
235 standard.

236

## 237 **B Cell ELISpots**

238 ELISpots were performed using the B cell ELISpot kits from Mabtech.  
239 Multiscreen-IP PVDF 96-well filter plates (type MAIPSWU) were treated with 70%  
240 ethanol prior to coating with antigen at a concentration of 10  $\mu\text{g}/\text{ml}$  in a volume of  
241 100  $\mu\text{L}$  per well and incubated overnight at 4°C. The next day plates were  
242 washed and blocked in a volume of 250  $\mu\text{L}$  per well in Iscove's Modified  
243 Dulbecco's Medium (IMDM) containing 10% FBS at room temperature. Bone  
244 marrow suspensions were flushed from the femors and tibias of mice using 30G  
245 needles with HBSS. After treatment with ACK lysing buffer for 5 minutes, cells  
246 were suspended in IMDM/10% FBS in volumes to be serially plated at 250,000,  
247 125,000, 62,500, and 31,250 cells per well in a volume of 100  $\mu\text{L}$  per well in  
248 triplicate and incubated at 37°C for approximately 16 hours. After washing, anti-  
249 IgG-biotin detection antibody was added at a concentration of 1  $\mu\text{g}/\text{ml}$  in a  
250 volume of 100  $\mu\text{L}$  per well and incubated at room temperature for 2 hours. After  
251 washing again, streptavidin-AP was diluted to 1:1,000 in PBS and added in a  
252 volume of 100  $\mu\text{L}$  per well and plates were incubated at room temperature for 1  
253 hour. After final washing, substrate solution was added and spots were allowed  
254 to develop for 20 minutes. The reaction was stopped by washing with water and  
255 once plates were dry images were captured using a CTL ImmunoSpot analyzer  
256 (Cellular Technology Limited, Shaker Heights, OH). Images were then manually  
257 inspected and counted. Images with clear resolution of spots (usually >10 and  
258 <40 spots per well) were used for calculating the number of spot forming units  
259 per million cells.  
260

261 **Antibodies**

262 All of the following antibodies were purchased from eBioscience (San  
263 Diego, CA), BioLegend (San Diego, CA), or BD Biosciences (San Jose, CA):  
264 anti-B220 (clone RA3-682), anti-CD138 (281-2), anti-IgD (11-26c.2a), anti-IgG  
265 (Poly4053), anti-GL7 (GL7), anti-CD11b (M1/70), anti-CD4 (GK1.5), anti-CD44  
266 (IM7), anti-CXCR5 (SPRCL5), anti-PD-1 (29F.1A12), anti-ICOS (7E.17G9), anti-  
267 Foxp3 (FJK-16s), and anti-Bcl6 (K112-91). Unconjugated primary antibodies  
268 were stained with Alexa Fluor-conjugated secondary antibodies (Invitrogen).

269

270 **References**

271

- 272 1 Nelson, R. W. *et al.* T cell receptor cross-reactivity between similar foreign  
273 and self peptides influences naive cell population size and autoimmunity.  
274 *Immunity* **42**, 95-107, doi:10.1016/j.immuni.2014.12.022 (2015).
- 275 2 Jones, D. S. *et al.* A Method for Producing Protein Nanoparticles with  
276 Applications in Vaccines. *PLoS One* **11**, e0138761,  
277 doi:10.1371/journal.pone.0138761 (2016).

278
